# Supplementary material for: Effect of procalcitonin-guided antibiotic treatment on clinical outcomes in intensive care unit patients with infection and sepsis patients: a patient-level meta-analysis of randomized trials
Source: Springer Nature journal article supplement (doi:10.1186/s13054-018-2125-7), 2018-08-15

## F1. Assessment of risk of bias in included trials

|                 | Random sequence generation (selection bias) | Allocation concealment (selection bias) | Blinding of participants and personnel (performance bias) | Blinding of outcome assessment (detection bias) | Incomplete outcome data (attrition bias) | Selective reporting (reporting bias) | Other bias |
|-----------------|---------------------------------------------|-----------------------------------------|-----------------------------------------------------------|-------------------------------------------------|------------------------------------------|--------------------------------------|------------|
| Annane 2013     | +                                           | +                                       | ?                                                         | -                                               | +                                        | +                                    | ?          |
| Bloos 2016      | +                                           | +                                       | ?                                                         | -                                               | +                                        | +                                    | ?          |
| Bouadma 2010    | +                                           | +                                       | ?                                                         | +                                               | +                                        | +                                    | ?          |
| De Jong 2016    | +                                           | +                                       | ?                                                         | -                                               | +                                        | +                                    | -          |
| Deliberato 2013 | +                                           | +                                       | ?                                                         | -                                               | +                                        | +                                    | -          |
| Hochreiter 2009 | -                                           | -                                       | ?                                                         | -                                               | +                                        | +                                    | ?          |
| Layos 2012      | ?                                           | ?                                       | ?                                                         | +                                               | +                                        | ?                                    | -          |
| Nobre 2008      | +                                           | +                                       | ?                                                         | -                                               | +                                        | +                                    | +          |
| Oliveira 2013   | +                                           | +                                       | ?                                                         | -                                               | +                                        | +                                    | +          |
| Schroeder 2009  | ?                                           | -                                       | ?                                                         | -                                               | +                                        | +                                    | ?          |
| Shehabi 2014    | +                                           | +                                       | ?                                                         | +                                               | +                                        | +                                    | +          |

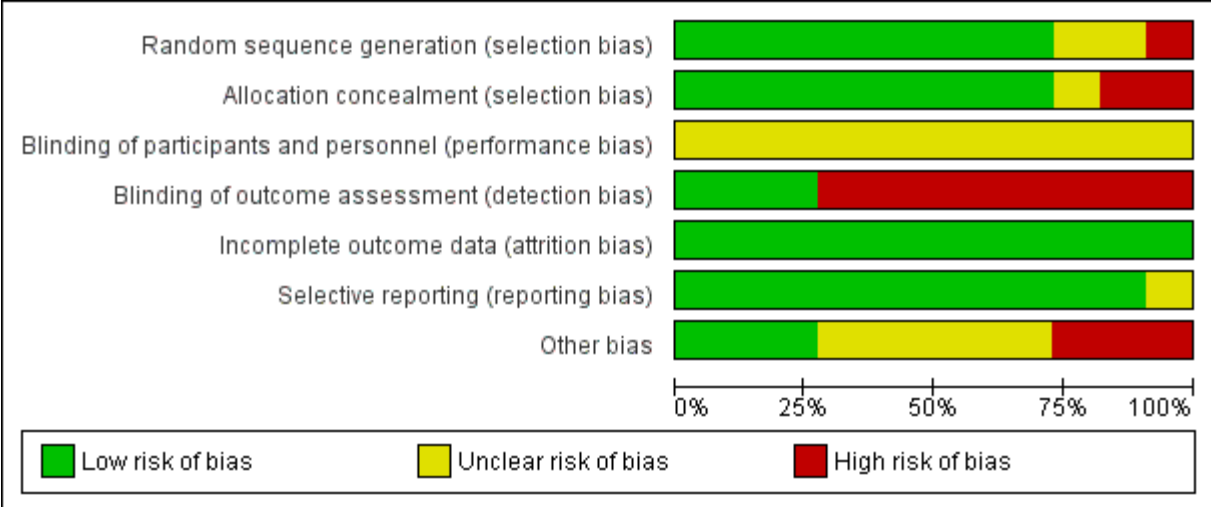

## F2 Forrest plot based on aggregate data

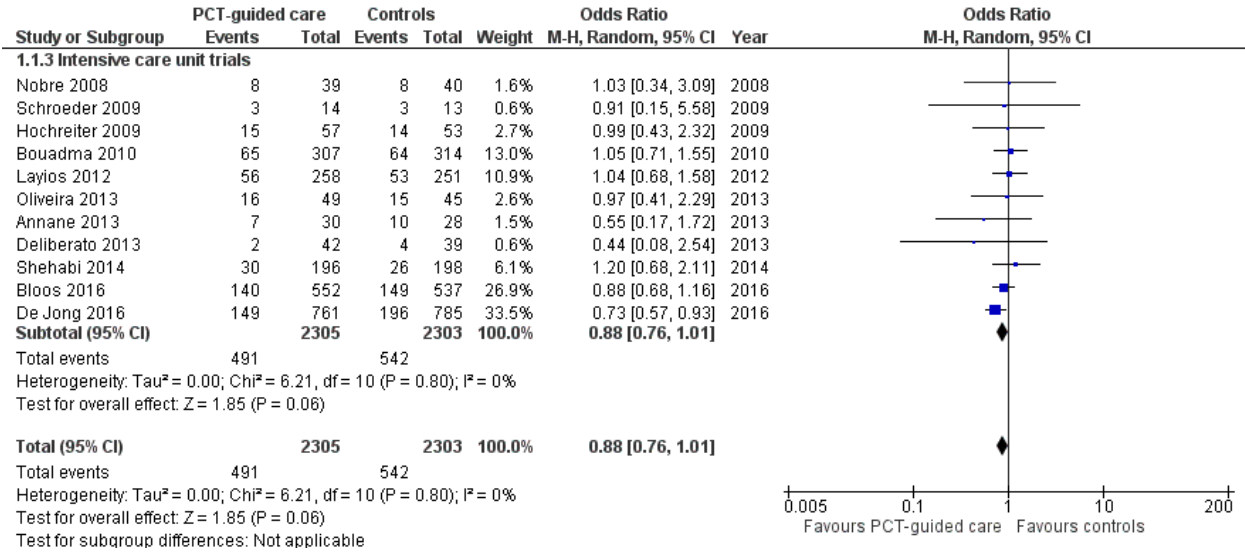

### F3 Funnel plots regarding possible publication bias

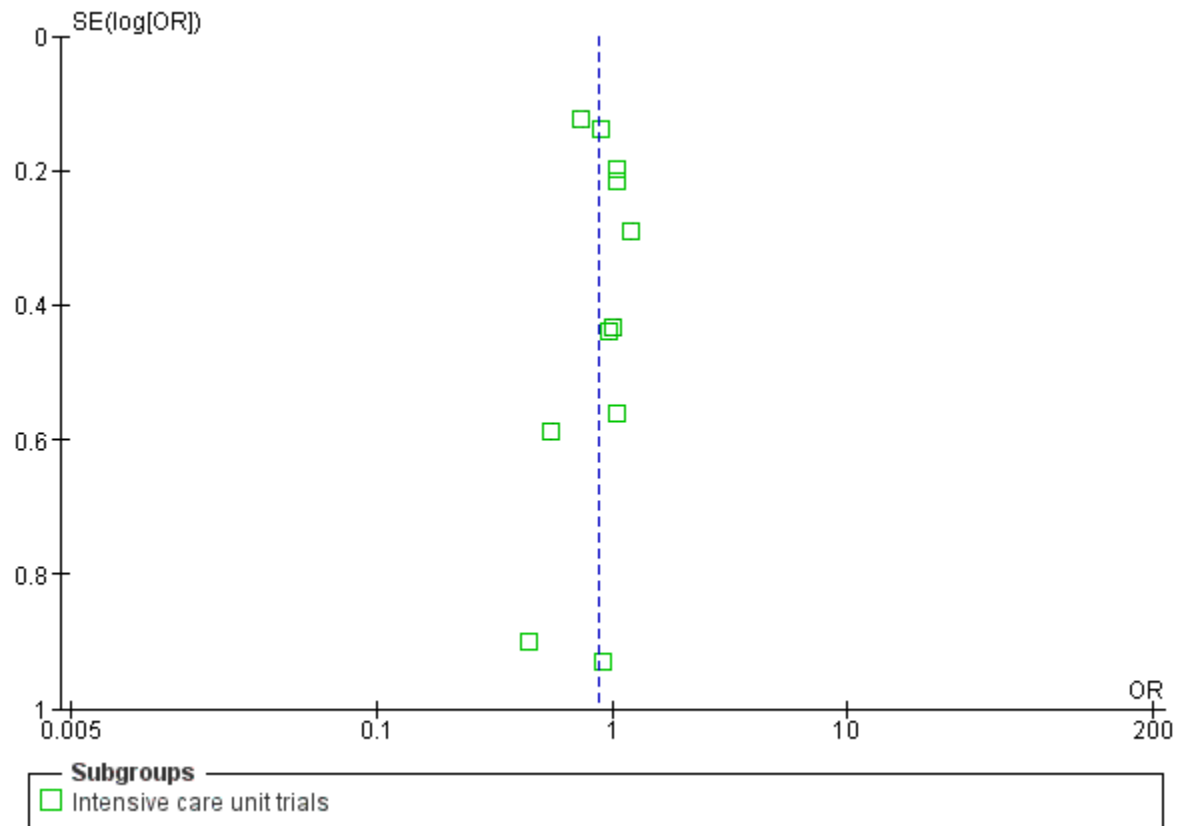

Supplement: MOESM1 [file 16039690]
